# Supplementary material
Source: PubMed Central journal article supplement (PMC5567865)
Supplement: NIHMS894177-supplement-Figure_S1.pdf [file NIHMS894177-supplement-Figure_S1.pdf]

Figure 1. Treatment Schema and chemotherapy doses

a) Treatment Schema

| Week |    |                   |      |    |    |    |    |    |      |    |    |      |    |    |    |    |    |    |
|------|----|-------------------|------|----|----|----|----|----|------|----|----|------|----|----|----|----|----|----|
| 1*   | 2  | 3                 | 4    | 5  | 6  | 7  | 8  | 9  | 10   | 11 | 12 | 13   | 14 | 15 | 16 | 17 | 18 | 19 |
| V    | V  | V                 | V    | V  | E  | V  | V  | I  |      | V  | V  | I    |    | V  | V  | I  |    | E  |
| Irin |    |                   | Irin |    | V  | D  |    | E  |      | D  |    | E    |    | D  |    | E  |    | V  |
|      |    |                   |      |    | A  | C  |    |    |      | C  |    |      |    | C  |    |    |    | A  |
|      |    |                   |      |    | L  |    |    |    |      |    |    |      |    |    |    |    |    | L  |
| Week |    |                   |      |    |    |    |    |    |      |    |    |      |    |    |    |    |    |    |
| 20   | 21 | 22                | 23   | 24 | 25 | 26 | 27 | 28 | 29   | 30 | 31 | 32   | 33 | 34 | 35 | 36 | 37 |    |
|      |    | Radiation Therapy |      |    |    |    |    | I  | V    | V  | I  |      | V  | V  | E  | V  |    |    |
| V    | V  | V                 | V    | V  |    | E  |    | D  |      | E  |    | D    |    | V  | A  |    |    |    |
| Irin |    |                   | Irin |    |    |    |    | C  |      |    |    | C    |    | A  | C  |    |    |    |
|      |    |                   |      |    |    |    |    |    |      |    |    |      |    | L  |    |    |    |    |
| Week |    |                   |      |    |    |    |    |    |      |    |    |      |    |    |    |    |    |    |
| 38   | 39 | 40                | 41   | 42 | 43 | 44 | 45 | 46 | 47#  | 48 | 49 | 50   | 51 | 52 | 53 | 54 |    |    |
| V    |    |                   | V    | V  | V  | V  |    |    | V    | V  |    | V    | V  |    |    | E  |    |    |
| A    |    |                   | A    |    |    | A  |    |    | Irin |    |    | Irin |    |    |    | V  |    |    |
| C    |    |                   | C    |    |    | C  |    |    |      |    |    |      |    |    |    | A  |    | L  |

b) Chemotherapy Doses

|                                                                                                                                                                                                                                           |                                                |                                                                                       |                                                  |
|-------------------------------------------------------------------------------------------------------------------------------------------------------------------------------------------------------------------------------------------|------------------------------------------------|---------------------------------------------------------------------------------------|--------------------------------------------------|
| RP4 weeks 35-54 V                                                                                                                                                                                                                         | Vincristine – give <u>before</u><br>Irinotecan | Age                                                                                   | Dose                                             |
|                                                                                                                                                                                                                                           |                                                | ≥ 3 years                                                                             | 1.5 mg/m <sup>2</sup> IV x 1 (maximum dose 2 mg) |
|                                                                                                                                                                                                                                           |                                                | ≥ 1 year and < 3 years                                                                | 0.05 mg/kg IV x 1 (maximum dose 2 mg)            |
|                                                                                                                                                                                                                                           |                                                | < 1 year                                                                              | 0.025 mg/kg IV x 1                               |
| Irin                                                                                                                                                                                                                                      | Irinotecan                                     | Irinotecan 50 mg/m <sup>2</sup> IV (maximum dose 100 mg/day) daily x 5                |                                                  |
| I                                                                                                                                                                                                                                         | Ifosfamide                                     | Age ≥ 1 year: 1800 mg.m <sup>2</sup> /day IV x 5                                      |                                                  |
|                                                                                                                                                                                                                                           |                                                | Age < 1 year: treat with 50% doses calculated on a m <sup>2</sup> basis, #            |                                                  |
| E                                                                                                                                                                                                                                         | Etoposide                                      | Age ≥ 1 year: 100 mg/m <sup>2</sup> /day IV x 5                                       |                                                  |
|                                                                                                                                                                                                                                           |                                                | Age < 1 year: treat with 50% doses calculated on a m <sup>2</sup> basis, #            |                                                  |
| D                                                                                                                                                                                                                                         | Doxorubicin                                    | Age ≥ 1 year: 37.5 mg/m <sup>2</sup> /day x 2 days (total dose 75 mg/m <sup>2</sup> ) |                                                  |
|                                                                                                                                                                                                                                           |                                                | Age < 1 year: treat with 50% doses calculated on a m <sup>2</sup> basis, #            |                                                  |
| # If tolerated (no delay in administration of the next cycle due to delayed count recovery or delayed resolution of other toxicities and no serious toxicities), consider increasing to 75% and then to 100% of the calculated full dose. |                                                |                                                                                       |                                                  |
| C                                                                                                                                                                                                                                         | Cyclophosphamide                               | ≥ 3 years                                                                             | 1200 mg/m <sup>2</sup> IV x 1                    |
|                                                                                                                                                                                                                                           |                                                | < 3 years                                                                             | 40 mg/kg IV x 1                                  |
| A                                                                                                                                                                                                                                         | Dactinomycin                                   | ≥ 1 year                                                                              | 0.045 mg/kg IV x 1 (maximum dose 2.5 mg)         |
|                                                                                                                                                                                                                                           |                                                | < 1 year                                                                              | 0.025 mg/kg IV x 1                               |
| MESNA will be used with Cyclophosphamide and Ifosfamide                                                                                                                                                                                   |                                                |                                                                                       |                                                  |
| Filgrastim will be used in VAC, VDC, and IE cycles. See Section 8 for specific directions. Sargramostim or Peg-Filgrastim should not be used.                                                                                             |                                                |                                                                                       |                                                  |
| If there is an age change during treatment use the new appropriate age dosing in the next cycle.                                                                                                                                          |                                                |                                                                                       |                                                  |
